# Supplementary material for: Synthesis and properties of hydrophilic–hydrophobic diblock copolymer ionomers based on poly(p-phenylene)s
Source: Royal Society of Chemistry journal article supplement (doi:10.1039/c4py00082j), 2014-01-01
Supplement: c4py00082j1.pdf [file c4py00082j1.pdf]

### Polymerization procedure of diblock copolymer **P1-P2(*m*-141)** by catalyst transfer polymerization.

All reactions were performed in a dry box under Ar atmosphere. To **P2(141)** THF solution, the second monomer, **1** treated with <sup>i</sup>PrMgCl·LiCl complex (1.3 M solution in THF) was added and stirred at room temperature for 30 h. The reaction was quenched with HCl aq./methanol. The insoluble material was washed with methanol and collected by suction filtration. The residue was reprecipitated from chloroform solution into acetone/methanol to give **P1-P2(*m*-141)** as a pale pink solid. Detailed synthetic condition was shown in Table S1.

Table S1. Synthesis condition of **P1-P2(*m*-141)**.

| Sample               | Monomer / mmol | Ni(dppe)Cl <sub>2</sub> / g (mmol) | THF / ml | Monomer/ Ni(dppe)Cl <sub>2</sub> | Yield / g (%) |
|----------------------|----------------|------------------------------------|----------|----------------------------------|---------------|
| <b>P1-P2(34-141)</b> | 5.40           | 0.0758                             | 300      | 71                               | 2.63 (47)     |
| <b>P1-P2(44-141)</b> | 5.40           | 0.0606                             | 300      | 89                               | 1.88 (48)     |
| <b>P1-P2(62-141)</b> | 6.48           | 0.0530                             | 300      | 122                              | 2.44 (48)     |

### Synthesis of diblock copolymer ionomers **SP1-P2(*m*-141)**.

The neopentyl protected sulfonyl group in **P1-P2(*m*-141)** was cleaved with an *N*-methylpyrrolidone solution of diethylamine hydrobromide at 120 °C for 48 h to obtain the acid form of the copolymer **SP1-P2(*m*-141)**. After cooling to room temperature, the reaction mixture was poured into diethyl ether. The insoluble material was collected by suction filtration. The product was stirred in 1 M HCl aq for 48 h and in water for 24 h to give **SP1-P2(*m*-141)** as a brown solid.

Table S2. Synthesis condition of **SP1-P2(*m*-141)**.

| Sample                | <b>P1-P2</b> / g | (C <sub>2</sub> H <sub>5</sub> ) <sub>2</sub> NH HBr / g (mmol) | NMP / ml | Yield / g (%) |
|-----------------------|------------------|-----------------------------------------------------------------|----------|---------------|
| <b>SP1-P2(34-141)</b> | 2.10             | 1.88 (12.2)                                                     | 40.0     | 1.22 (63)     |
| <b>SP1-P2(44-141)</b> | 1.60             | 1.58 (10.3)                                                     | 20.0     | 0.716 (49)    |
| <b>SP1-P2(62-141)</b> | 1.90             | 2.45 (15.9)                                                     | 20.0     | 1.47 (88)     |

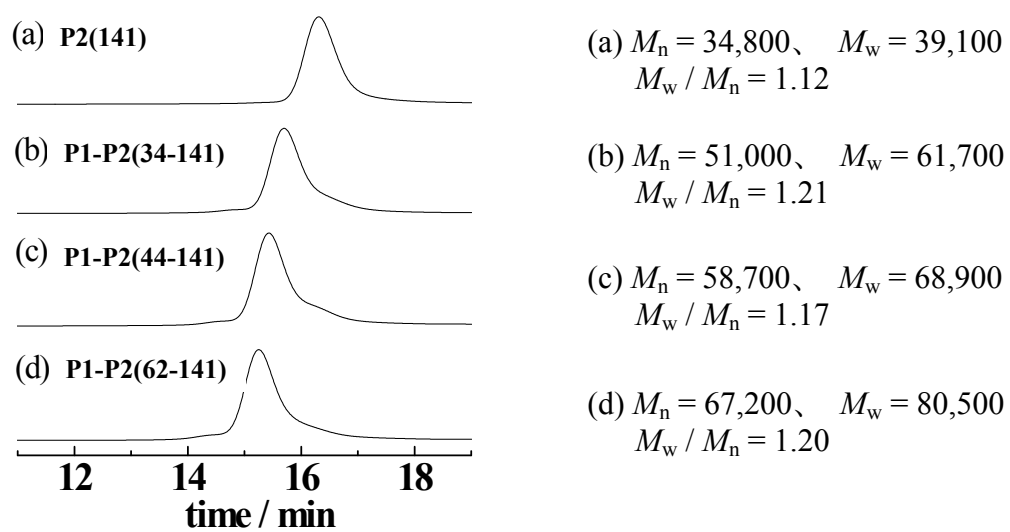

Figure S1. GPC profiles of **P2(141)** and **P1-P2(*m*-141)** in THF.

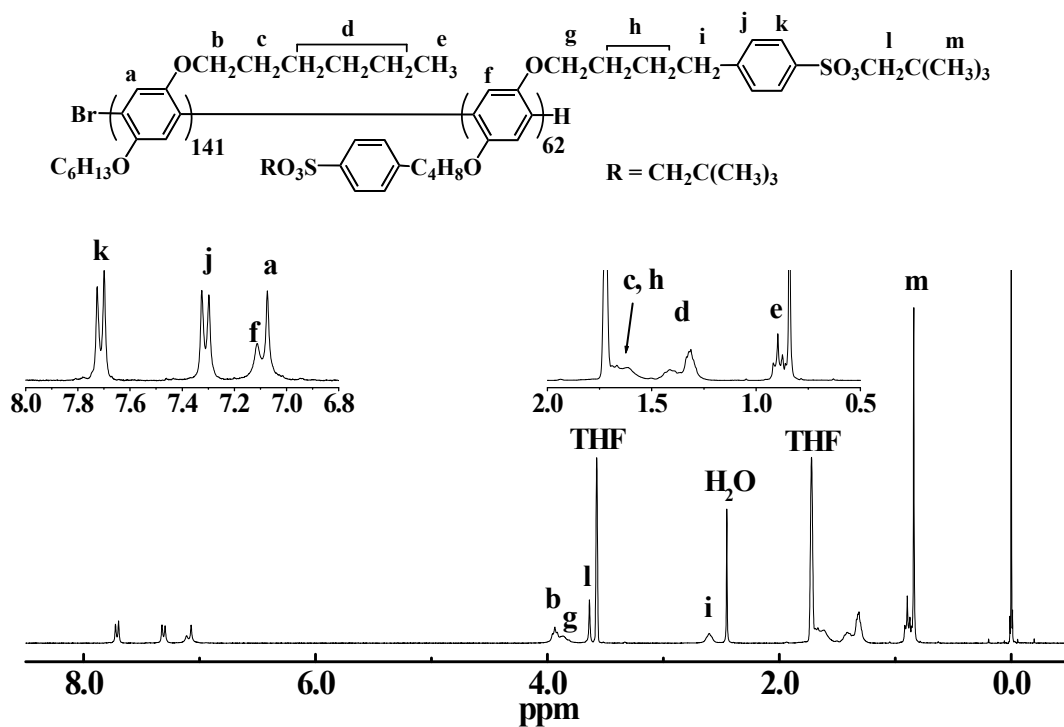

Figure S2. <sup>1</sup>H NMR spectrum of P1-P2(62-141) in THF-*d*<sub>8</sub>.

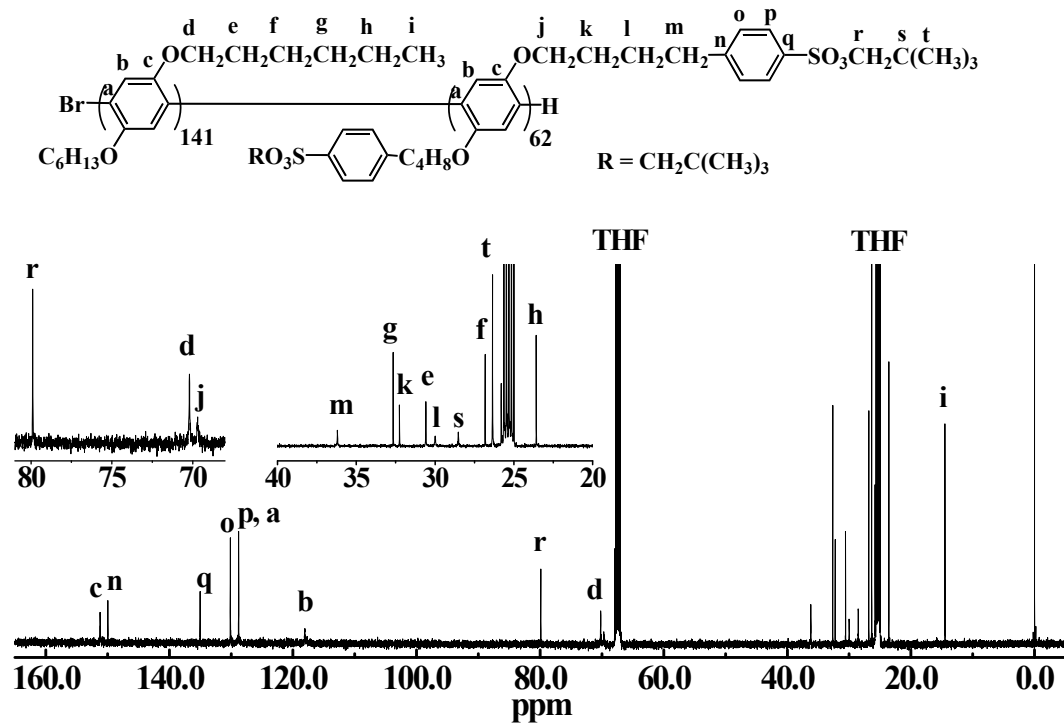

Figure S3. <sup>13</sup>C NMR spectrum of P1-P2(62-141) in THF-*d*<sub>8</sub>.

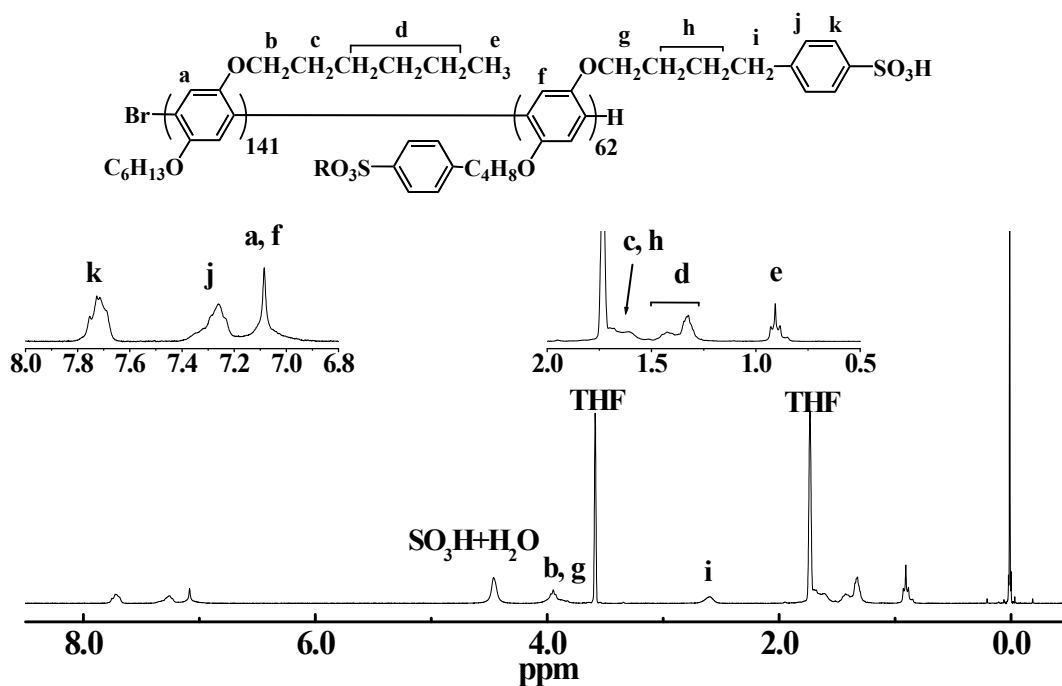

Figure S4.  $^1\text{H}$  NMR spectrum of SP1-P2(62-141) in  $\text{THF-}d_8$ .

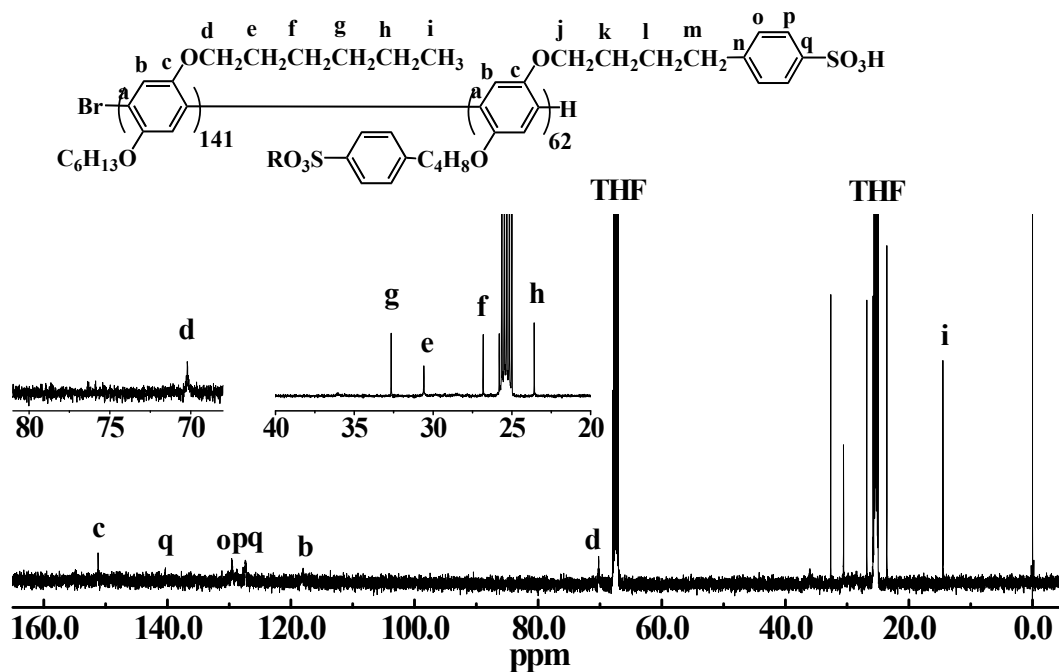

Figure S5.  $^{13}\text{C}$  NMR spectrum of SP1-SP2(62-141) in  $\text{THF-}d_8$ .

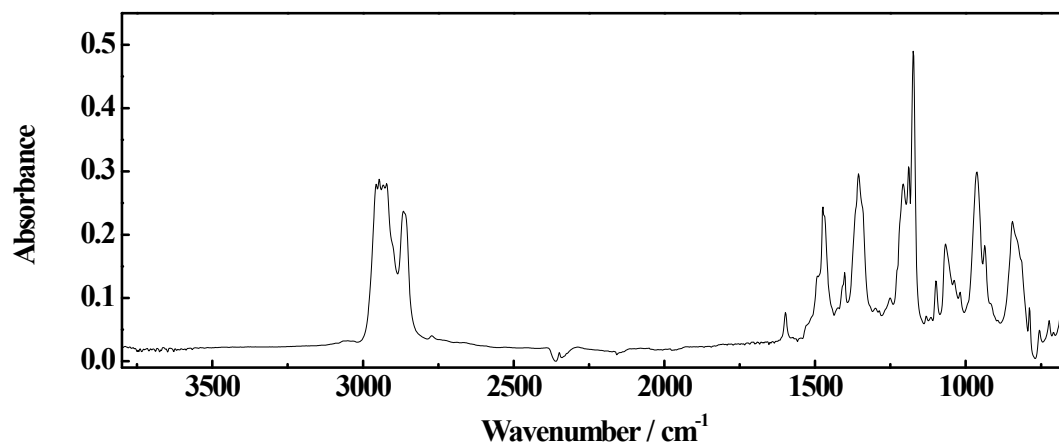

Figure S6. FT-IR spectrum of P1-P2(141-62).

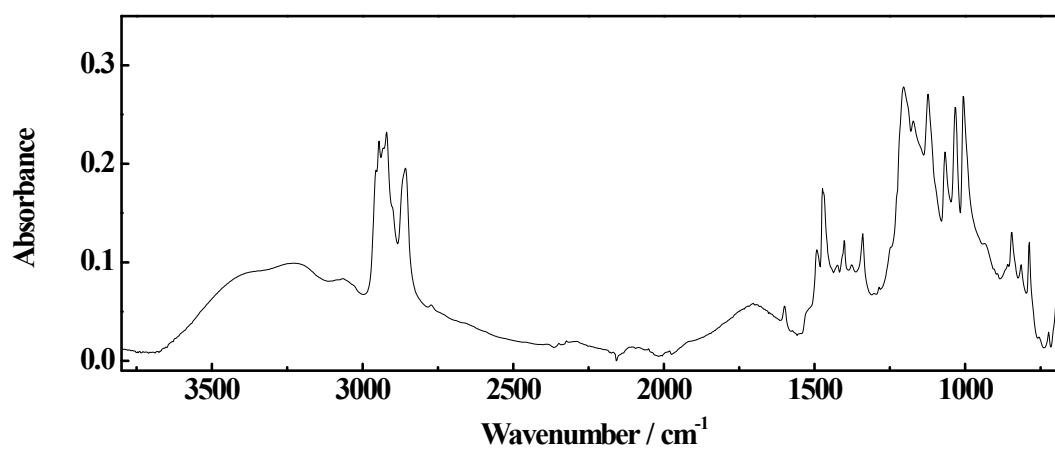

Figure S7. FT-IR spectrum of SP1-P2(141-62).

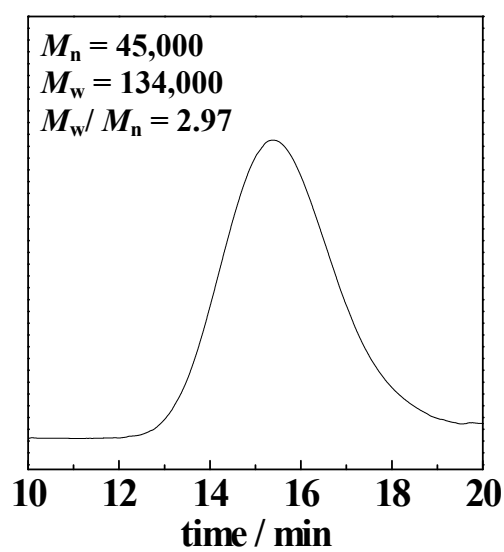

Figure S8. GPC profile of S-PPBP.
